# Supplementary material for: Patient and public involvement in the development of health services: Engagement of underserved populations in a quality improvement programme for inflammatory bowel disease using a community‐based participatory approach
Source: PubMed Central journal article supplement (PMC10909615; doi:10.1111/hex.14004), 2024-03-03
Supplement: HEX-27-e14004-s003.pdf [file HEX-27-e14004-s003.pdf]

1 Supplementary File 1. GRIPP 2 Short Form

| <b>Section and topic</b>         | <b>Item</b>                                                                                                                               | <b>Reported on page No</b>                        |
|----------------------------------|-------------------------------------------------------------------------------------------------------------------------------------------|---------------------------------------------------|
| Aim                              | Report the aim of PPI in the study                                                                                                        | Page 4, lines 76-80                               |
| Methods                          | Provide a clear description of the methods used for PPI in the study. How we identified underserved groups.                               | Pages 4-8                                         |
| Study results                    | Outcomes—Report the results of PPI in the study, including both positive and negative outcomes                                            | Pages 8-15, see Table 3 for a summary of outcomes |
| Discussion and conclusions       | Outcomes—Comment on the extent to which PPI influenced the study overall. Describe positive and negative effects                          | Pages 13 and 14                                   |
| Reflections/critical perspective | Comment critically on the study, reflecting on the things that went well and those that did not, so others can learn from this experience | Pages 15-19                                       |

2
